# Supplementary material for: A highly sensitive and miniaturized wearable antenna based on MXene films for strain sensing
Source: Royal Society of Chemistry journal article supplement (doi:10.1039/d2ma00863g), 2022-12-19
Supplement: d2ma00863g1.pdf [file d2ma00863g1.pdf]

## Support information

### Highly sensitive and miniaturized wearable antenna based on MXene films for strain sensing

Ao Yin,<sup>ab</sup> Chen Zhang<sup>\*ab</sup>, Jingjing Luo,<sup>ab</sup> Jiang Liu,<sup>ab</sup> Zhongqi Ren,<sup>ab</sup> Yuxin Wang,<sup>ab</sup> Yang Ye,<sup>ab</sup> Rui Yin,<sup>ab</sup> Qiang Feng,<sup>ab</sup> Youyou Chen,<sup>abc</sup> Kang Li,<sup>ab</sup> Weiwei Zhao<sup>\*abc</sup> Suzhu Yu<sup>\*ab</sup> and Jun Wei<sup>\*abc</sup>

a. Shenzhen Key Laboratory of Flexible Printed Electronics Technology, Harbin Institute of Technology (Shenzhen), Shenzhen 518055, People's Republic of China Email: zhangchen2020@hit.edu.cn, wzhao@hit.edu.cn, junwei@hit.edu.cn

b. Sauvage Laboratory for Smart Materials, School of Materials Science and Engineering, Harbin Institute of Technology (Shenzhen), Shenzhen 518055, People's Republic of China

c. State Key Laboratory of Advanced Welding & Joining, Harbin Institute of Technology, Harbin 150001, People's Republic of China

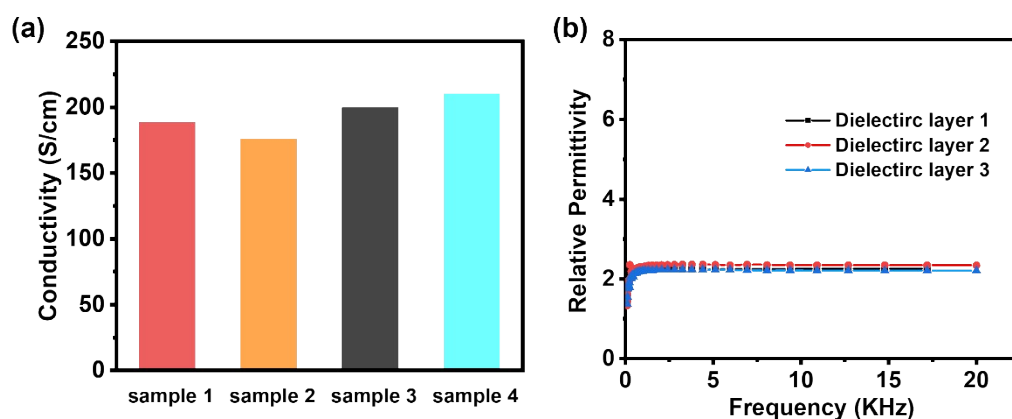

Fig. S1. (a) The conductivity of various MXene patch samples. (b) The relative permittivity of various PDMS substrates.
